# Supplementary material for: Gene expression profiling to predict recurrence of advanced squamous cell carcinoma of the tongue: discovery and external validation
Source: PubMed Central journal article supplement (PMC5617464; doi:10.18632/oncotarget.18692), 2017-06-27
Supplement: oncotarget-08-61786-s001.pdf [file oncotarget-08-61786-s001.pdf]

# Gene expression profiling to predict recurrence of advanced squamous cell carcinoma of the tongue: discovery and external validation

## SUPPLEMENTARY MATERIALS

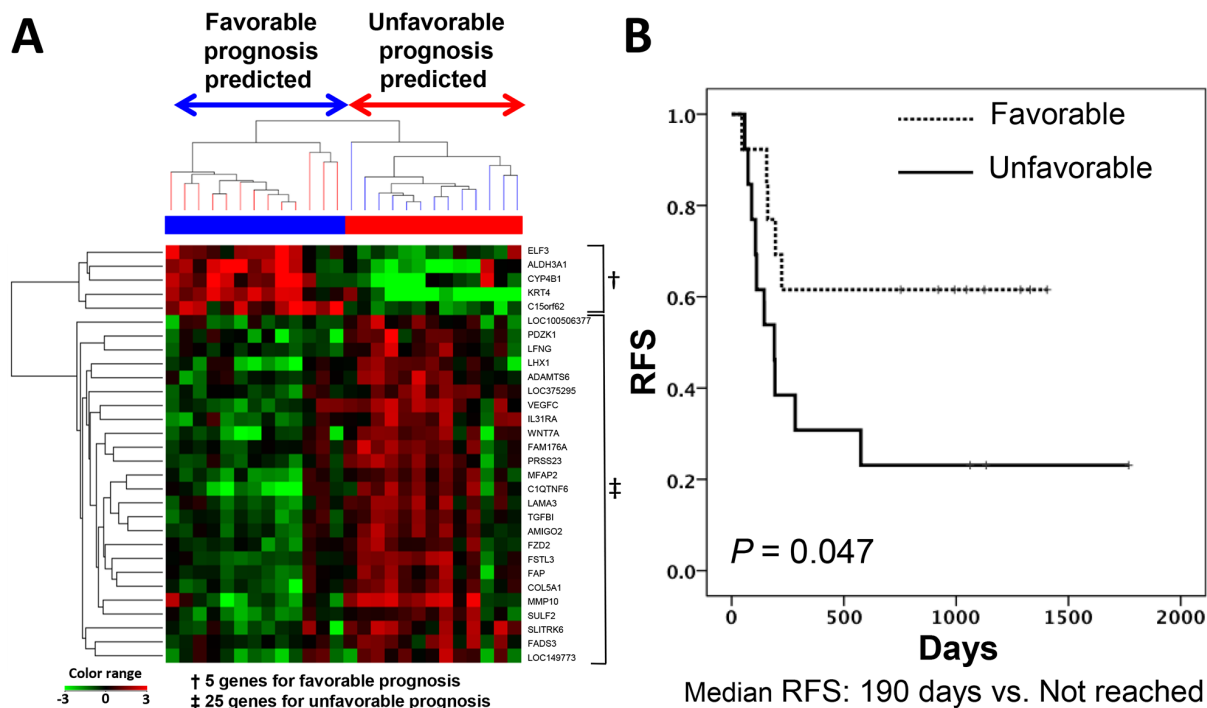

Supplementary Figure 1: Subgrouping through hierarchical clustering based on expression of 30 predictive genes in the discovery study.

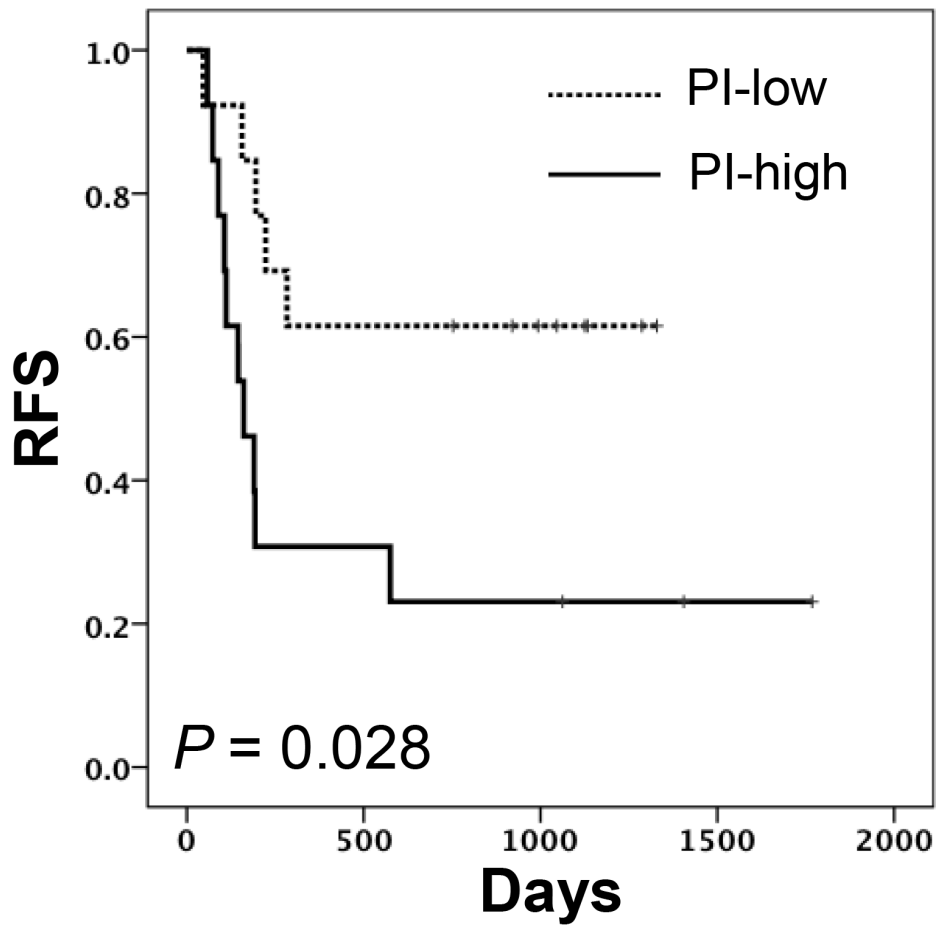

Median RFS: 161 days vs. Not reached

Supplementary Figure 2: Kaplan-Meier curves of the two subgroups divided based on predictive formula in the discovery study.

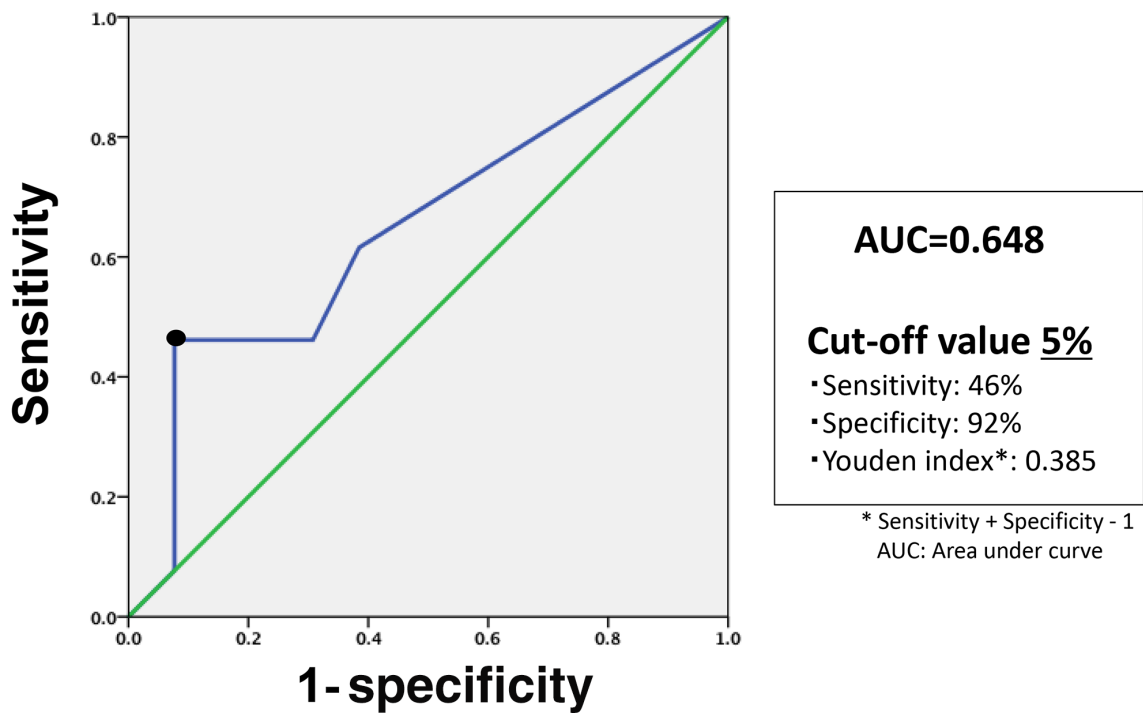

Supplementary Figure 3: Receiver operating characteristic (ROC) analysis for relationship between CK-4 protein positivity and KRT4 gene expression in the discovery study.

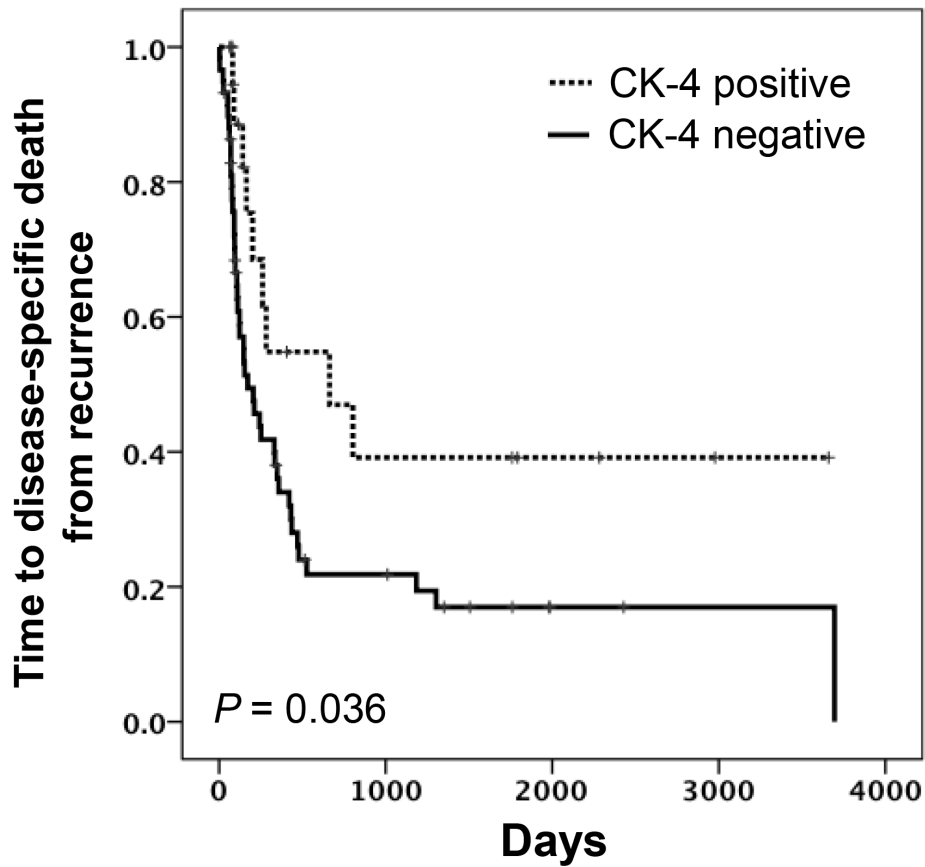

Median time to death: 57 days vs. 316 days

Supplementary Figure 4: Kaplan-Meier curves for the length of time after recurrence until cancer-specific death according to CK-4 protein expression by immunohistochemical staining.

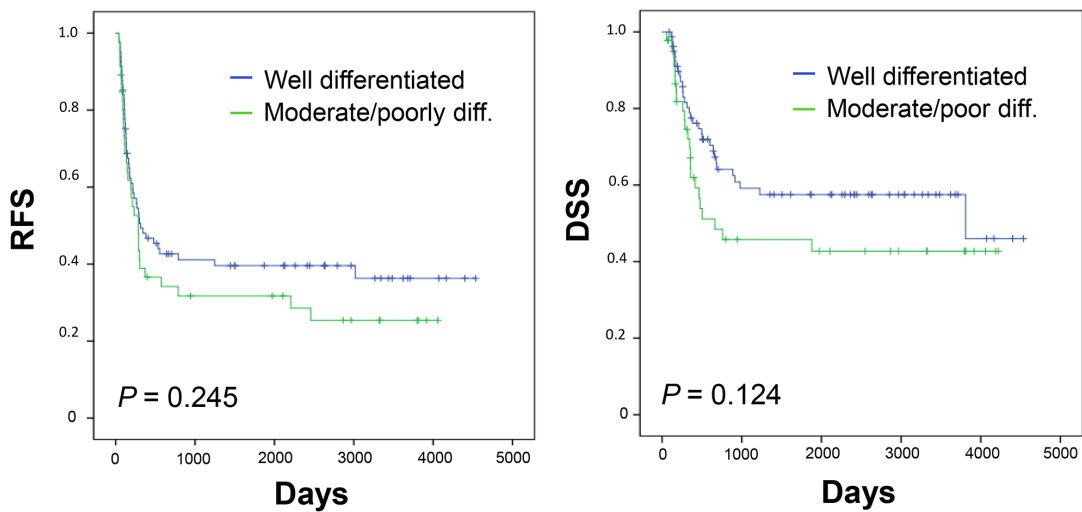

Median DSS: 284 days vs. 316 days

Median DSS: 663 days vs. 3809 days

Supplementary Figure 5: Kaplan-Meier curves according to tumor differentiation in the validation study of immunohistochemical staining.

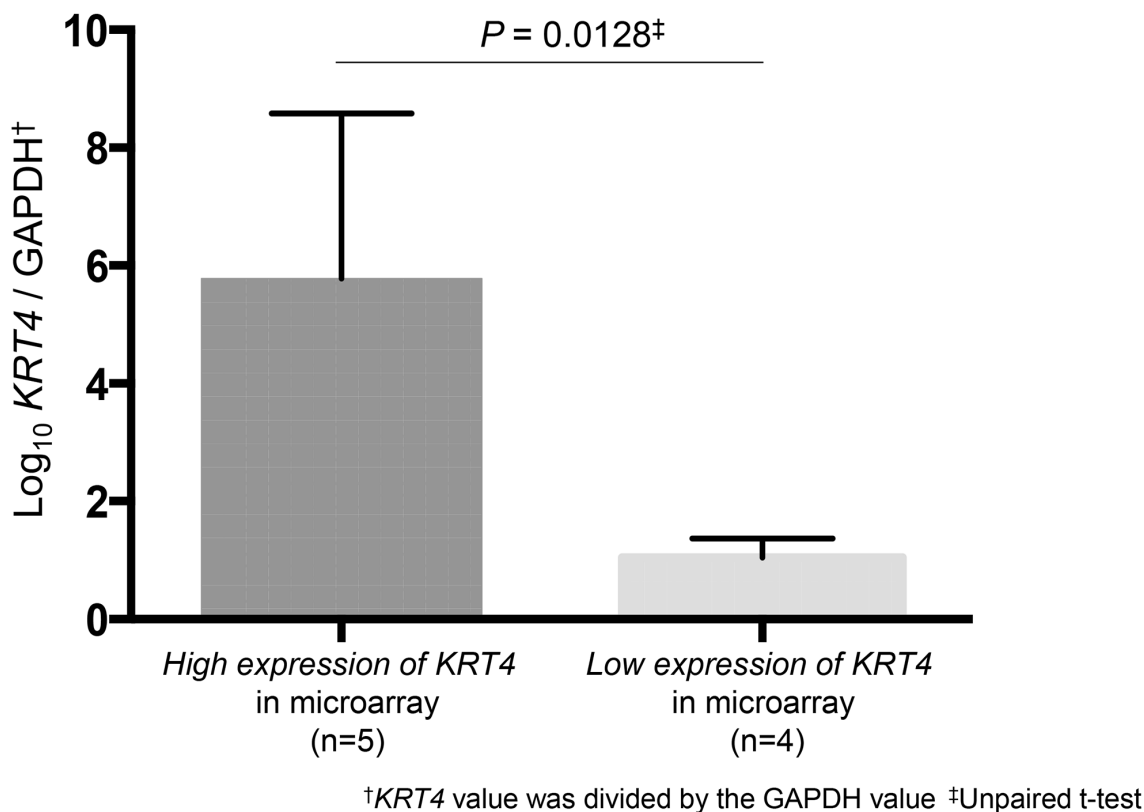

Supplementary Figure 6: Relationship of the expression of 30 genes between cluster A, cluster B and normal tissues.

**Prognostic index (PI)**  $= \sum_{i=1}^{30} W_i X_i$

Where  
 $W_i$  is the regression coefficient estimated from the univariate Cox model in log10 scale  
 $X_i$  is the raw gene expression value in log10 scale

**25 up-regulated genes in cluster A**  
(Unfavorable group)

| Probe ID    | Gene symbol | Regression coefficient | Probe ID    | Gene symbol  | Regression coefficient |
|-------------|-------------|------------------------|-------------|--------------|------------------------|
| 229441_at   | PRSS23      | 7.128                  | 209955_s_at | FAP          | 3.015                  |
| 205680_at   | MMP10       | 5.759                  | 205380_at   | PDZK1        | 2.991                  |
| 203492_s_at | FSTL3       | 4.933                  | 1559433_at  | LOC149773    | 2.978                  |
| 237411_at   | ADAMTS6     | 4.890                  | 216080_s_at | FADS3        | 2.918                  |
| 212489_at   | COL5A1      | 4.472                  | 206230_at   | LHX1         | 2.859                  |
| 203726_s_at | LAMA3       | 3.526                  | 210248_at   | WNT7A        | 2.847                  |
| 228762_at   | LFNG        | 3.459                  | 227828_s_at | FAM176A      | 2.847                  |
| 210220_at   | FXD2        | 3.346                  | 209946_at   | VEGFC        | 2.801                  |
| 223571_at   | C1QTNF6     | 3.320                  | 242005_at   | LOC100506377 | 2.579                  |
| 233555_s_at | SULF2       | 3.179                  | 243541_at   | IL31RA       | 2.512                  |
| 222108_at   | AMIGO2      | 3.125                  | 228564_at   | LOC375295    | 2.477                  |
| 203417_at   | MFAP2       | 3.125                  | 235976_at   | SLITRK6      | 2.458                  |
| 201506_at   | TGFBI       | 3.125                  |             |              |                        |

**5 up-regulated genes in cluster B**  
(Favorable group)

| Probe ID    | Gene Symbol | Regression coefficient |
|-------------|-------------|------------------------|
| 205623_at   | ALDH3A1     | 0.310                  |
| 229842_at   | ELF3        | 0.334                  |
| 213240_s_at | KRT4        | 0.344                  |
| 210096_at   | CYP4B1      | 0.370                  |
| 1569064_at  | C15orf62    | 0.413                  |

Supplementary Figure 7: Prognostic index.

**Supplementary Table 1: Clinicopathologic characteristics of patients in the discovery study classified according to unsupervised hierarchical clustering.**

See Supplementary File 1

**Supplementary Table 2: Functional Enrichment Analyses in the discovery cohort.**

See Supplementary File 2

**Supplementary Table 3: Association between potential prognostic factors and time to disease-specific death from recurrence in the validation study of immunohistochemical staining**

| Variable                       | n  | Time to disease-specific death from recurrence |             |         |
|--------------------------------|----|------------------------------------------------|-------------|---------|
|                                |    | Hazard ratio                                   | 95% CI      | P value |
| Age at recurrence <sup>†</sup> |    | 0.994                                          | 0.974-1.014 | 0.559   |
| <b>Gender</b>                  |    |                                                |             |         |
| Male                           | 62 | Reference                                      | 0.669-2.764 | 0.395   |
| Female                         | 18 | 1.360                                          |             |         |
| <b>Recurrence location</b>     |    |                                                |             |         |
| Loco-regional                  | 54 | Reference                                      | 0.507-1.823 | 0.904   |
| Distant metastasis             | 26 | 0.961                                          |             |         |
| <b>Salvage surgery</b>         |    |                                                |             |         |
| No                             | 58 | Reference                                      | 0.049-0.237 | <0.001  |
| Yes                            | 22 | 0.108                                          |             |         |
| <b>Systemic chemotherapy</b>   |    |                                                |             |         |
| No                             | 64 | Reference                                      | 0.100-0.462 | <0.001  |
| Yes                            | 16 | 0.215                                          |             |         |
| <b>CK4</b>                     |    |                                                |             |         |
| Negative                       | 59 | Reference                                      | 0.201-0.870 | 0.02    |
| Positive                       | 21 | 0.418                                          |             |         |

<sup>†</sup>Continuous variable. CI, confidence interval; CK4, cytokeratin4.

Supplementary Table 4: Correlation of CK4 expression with clinicopathological features

|                                                       | CK4-positive<br>(n=40) | CK4-negative<br>(n=87) | P value |
|-------------------------------------------------------|------------------------|------------------------|---------|
| <b>Age<sup>†</sup> Mean ±SD (range)</b>               | 54.13 ±15.8 (24-77)    | 58.37 ±13.9 (25-88)    | 0.225   |
| <b>Gender (%)</b>                                     |                        |                        |         |
| Male                                                  | 29 (73)                | 68 (78)                | 0.485   |
| Female                                                | 11 (27)                | 19 (22)                |         |
| <b>Smoking status (%)</b>                             |                        |                        |         |
| Never                                                 | 12 (30)                | 20 (23)                | 0.398   |
| Current/former                                        | 28 (70)                | 67 (77)                |         |
| <b>Alcohol status (%)</b>                             |                        |                        |         |
| Never                                                 | 10(25)                 | 13 (15)                | 0.172   |
| Current/former                                        | 30(75)                 | 74 (85)                |         |
| <b>pT stage (%)</b>                                   |                        |                        |         |
| T1-2                                                  | 9 (23)                 | 27 (31)                | 0.322   |
| T3-4                                                  | 31 (77)                | 60 (69)                |         |
| <b>pN stage (%)</b>                                   |                        |                        |         |
| N0-1                                                  | 16 (40)                | 29 (33)                | 0.466   |
| T2-3                                                  | 24 (60)                | 58 (67)                |         |
| <b>Histological differentiation (%)</b>               |                        |                        |         |
| Well                                                  | 31 (77)                | 50 (58)                | 0.029   |
| Moderate/poor                                         | 9 (23)                 | 37 (42)                |         |
| <b>Extranodal spread of lymph node metastasis (%)</b> |                        |                        |         |
| Absent                                                | 30 (75)                | 66 (76)                | 0.916   |
| Present                                               | 10 (25)                | 21 (24)                |         |
| <b>Positive margin (%)</b>                            |                        |                        |         |
| Absent                                                | 34 (85)                | 73 (84)                | 0.875   |
| Present                                               | 6 (15)                 | 14 (16)                |         |
| <b>Vascular invasion (%)</b>                          |                        |                        |         |
| Absent                                                | 12 (30)                | 12 (14)                | 0.030   |
| Present                                               | 28 (70)                | 75 (86)                |         |
| <b>Lymphatic invasion (%)</b>                         |                        |                        |         |
| Absent                                                | 33 (83)                | 68 (78)                | 0.573   |
| Present                                               | 7 (18)                 | 19 (22)                |         |
| <b>Perineural invasion (%)</b>                        |                        |                        |         |
| Absent                                                | 15 (27)                | 44 (51)                | 0.170   |
| Present                                               | 25 (63)                | 43 (49)                |         |

NOTE: The t-test was used for continuous variables and the Pearson's chi-square test for categorical variables. <sup>†</sup>Continuous variables. CK4, cytokeratin4; PORT, postoperative radiotherapy; POCRT, postoperative chemoradiotherapy.

**Supplementary Table 5: Datasets used in the validation study**

| <b>Dataset</b> | <b>Number of samples</b> | <b>Nature of samples</b>      | <b>Prognostic data</b>             | <b>Paper publication/author</b>                                             |
|----------------|--------------------------|-------------------------------|------------------------------------|-----------------------------------------------------------------------------|
| GSE31056       | 23                       | TSCC: 23<br>Stage III/IV: 9)  | Relapse-free survival<br>RFS)      | <i>BMC Cancer</i> 2011,11:437/<br>Patricia P Reis et. al [33]               |
| GSE42743       | 49                       | OSCC: 49<br>Stage III/IV: 49) | Disease-specific survival<br>(DSS) | <i>Clin Cancer Res.</i><br>2013,1;19(5):1197-203./<br>Pawadee L et. al [24] |
| GSE41613       | 51                       | OSCC: 51<br>Stage III/IV: 51) | Disease-specific survival<br>DSS)  |                                                                             |

NOTE: The primary expression microarray data are available at Gene Expression Omnibus (<http://www.ncbi.nlm.nih.gov/geo/>; NCBI). TSCC, tongue squamous cell carcinoma; OSCC, oral squamous cell carcinoma.

**Supplementary Table 6: List of primer sequences used for RT-qPCR analysis**

| <b>Genes</b> | <b>Primer sequences</b>                                 |
|--------------|---------------------------------------------------------|
| KRT4         | F: CCATCAACCAGAGCTTGCTCAC<br>R: TCCATTTGGTCTCCAGGACCTTA |
| GAPDH        | F: GCACCGTCAAGGCTGAGAAC<br>R: TGGTGAAGACGCCAGTGGA       |

NOTE: F; Forward primer, R; reverse primer.
